# Supplementary material for: Enhanced Rice Blast Resistance by CRISPR/Cas9-Targeted Mutagenesis of the ERF Transcription Factor Gene OsERF922
Source: PubMed Central journal article supplement (PMC4846023; doi:10.1371/journal.pone.0154027), 2016-04-26
Supplement: pone.0154027.s006.pdf [file pone.0154027.s006.pdf]

**S1 Table. Primers used in this study**

| Primers  | Primer sequence (5'→3')                              | For experiment                                     |
|----------|------------------------------------------------------|----------------------------------------------------|
| E922-FS1 | GGCAAGAGCTAGCACTGGAAGTC                              | Vector construct                                   |
| E922-RS1 | AAACGACTTCCAGTGCTAGCTCT                              |                                                    |
| E922-FS2 | GCCGCCCGCATGTCTCTCTCTCT                              | Vector construct                                   |
| E922-RS2 | AAACAGGAGAGAGACATGCGGGG                              |                                                    |
| E922-FS3 | GTTGAGGCGATCGGCACCGACGC                              | Vector construct                                   |
| E922-RS3 | AAACGCGTCGGTGCCGATCGCCT                              |                                                    |
| U-F      | CTCCGTTTTACCTGTGGAATCG                               | Vector construct                                   |
| gR-R     | CGGAGGAAAATCCATCCAC                                  |                                                    |
| Pps-GGL  | TTCAGAG <u>GTCTCT</u> CTCGACTAGTATGGAATCGGCAGCAAAGG  | Vector construct                                   |
| Pgs-GG2  | AGCGTGG <u>GTCTCT</u> GACCGACGCGTATCCATCCACTCCAAGCTC |                                                    |
| Pps-GG2  | AGCGTGG <u>GTCTCT</u> CGTCAGGGTCCATCCACTCCAAGCTC     |                                                    |
| Pgs-GG3  | TTCAGAG <u>GTCTCT</u> CTGACACTGGAATCGGCAGCAAAGG      |                                                    |
| Pps-GG3  | AGCGTGG <u>GTCTCT</u> CGTCTTCACTCCATCCACTCCAAGCTC    |                                                    |
| Pgs-GGR  | TTCAGAG <u>GTCTCT</u> TAAGACTTTGGAATCGGCAGCAAAGG     |                                                    |
| E922-KF  | AGCTCTTCCTCGGGTTCAAA                                 | Amplification of fragments across ERF922-S2        |
| E922-KR  | AGGCGATCGGCACCGACGC                                  |                                                    |
| E922P-2F | CCGAGGAGGTTGCGAAATCA                                 | Amplification of fragments across all target sites |
| E922-KR2 | ACAGAGACACGTCCACGCGT                                 |                                                    |
| Cas9p-F  | TTCGACCAGTCCAAGAACGG                                 | <i>Cas9</i> detection                              |
| Cas9p-R  | CTTGACCTTGGTGAGCTCGT                                 |                                                    |

The restriction enzyme site *Bsa*I was underlined.
