# Supplementary material for: Enhanced Rice Blast Resistance by CRISPR/Cas9-Targeted Mutagenesis of the ERF Transcription Factor Gene OsERF922
Source: PubMed Central journal article supplement (PMC4846023; doi:10.1371/journal.pone.0154027), 2016-04-26
Supplement: pone.0154027.s007.pdf [file pone.0154027.s007.pdf]

**S2 Table. Nucleotide sequences at the target sites in C-ERF922S1S2-induced T<sub>0</sub> mutant rice plants**

| Mutant plants | Sequence (5'-3')                                                    | Mutation type        |
|---------------|---------------------------------------------------------------------|----------------------|
|               | S1                                                                  | S2                   |
| wild-type     | ttccaGAC--TTCCAGTGCTAGCTCTTcct.....acaGCCCCGCATGTCTCTCT-CCTtgggg    | wt                   |
| KS12-31       | -----acaGCCCCGCATG-----gggg                                         | S1: -80, S2: -11     |
|               | -----acaGCCCCGCATG-----gggg                                         | S1: -80, S2: -11     |
| KS12-34       | ttccaGACT-TTCCAGTGCTAGCTCTTcct.....acaGCCCCGCATGTCTCT--CCTtgggg     | S1: +1, S2: -2       |
|               | ttccaGACT-TTCCAGTGCTAGCTCTTcct.....acaGCCCCGCATGTCTCT--CCTtgggg     | S1: +1, S2: -2       |
| KS12-36       | ttccaGACT-TTCCAGTGCTAGCTCTTcct.....acaGCCC-----gg                   | S1: +1, S2: -19      |
|               | ttccaGACT-TTCCAGTGCTAGCTCTTcct.....TTGGCCTGGAGCCCGGACATTTTGCGC..... | S1: +1, S2: -42/+41  |
| KS12-48       | ttcca-----GTGCTAGCTCTTcct.....acaGCCCCGCATGTCTCTC-----tgggg         | S1: -8, S2: -4       |
|               | ttcca-----GTGCTAGCTCTTcct.....acaGCCCCGCATGTCTCTC-----tgggg         | S1: -8, S2: -4       |
| KS12-100      | ttccaGAC--TTC-----                                                  | S1S2: -195           |
|               | ttccaGAC--TTC-----                                                  | S1S2: -195           |
| KS12-101      | ttccaGAC--TTCCAGTGCTAGCTCTTcct.....acaGCCCCGCATGTCTCTCT-CCTtgggg    | wt                   |
|               | ttccaGACT-TTCCAGTGCTAGCTCTTcct.....acaGCCCCGCATGTCTCTCT-----gggg    | S1: +1, S2: -4       |
| KS12-114      | ttccaGA-----GCTCTTcct.....acaGCCCCGCATGTCTCTCT-CCTtgggg             | S1: -12, S2: wt      |
|               | ttccaGA-----GCTCTTcct.....acaGCCCCGCATGTCTCTCT-CCTtgggg             | S1: -12, S2: wt      |
| KS12-124      | ttccaGAC--T-----CCTtgggg                                            | S1S2: -168           |
|               | ttccaGAC--T-----CCTtgggg                                            | S1S2: -168           |
| KS12-125      | ttccaGAC-----GTGCTAGCTCTTcct.....acaGCCCCGCATGTCTCTC-----Ttgggg     | S1: -5, S2: -4       |
|               | ttccaGACA-TTCCAGTGCTAGCTC-----acaGCCCCGCATGT-----AA-CCTtgggg        | S1: -6/+1, S2: -6/+2 |

Continued the table

|          |                                                                           |                 |
|----------|---------------------------------------------------------------------------|-----------------|
| KS12-130 | ttccaGAC-----AGTGCTAGCTCTTcct.....acaGCCCCGCATGTCTCTCTACCTtgggg           | S1: -4, S2: +1  |
|          | ttccaGAC-----GTGCTAGCTCTTcct.....acaGCCCCGCATGTCTCTCTTCCtgggg             | S1: -5, S2: +1  |
| KS12-162 | ttccaGAC <b>T</b> -TTCCAGTGCTAGCTCTTcct.....acaGCCCCGCATGTC----T-CCTtgggg | S1: +1, S2: -4  |
|          | ttccaGAC <b>TT</b> TTCCAGTGCTAGCTCTTcct.....acaGCCCCGCATGTC----T-CCTtgggg | S1: +2, S2: -4  |
| KS12-163 | ttccaGAC--T-----CCTtgggg                                                  | S1S2: -168      |
|          | ttccaGAC--T-----CCTtgggg                                                  | S1S2: -168      |
| KS12-164 | ttccaGAC--T-----CCTtgggg                                                  | S1S2: -168      |
|          | ttccaGAC--T-----CCTtgggg                                                  | S1S2: -168      |
| KS12-175 | ttccaGAC- <b>T</b> TTCCAGTGCTAGCTCTTcct.....acaGCCCCGCATGTC-----tgggg     | S1: +1, S2: -8  |
|          | ttccaGAC- <b>TT</b> TTCCAGTGCTAGCTCTTcct.....acaGCCCCGCATGTC-----tgggg    | S1: +1, S2: -8  |
| KS12-181 | ttccaGAC---TCCAGTGCTAGCTCTTcct.....acaGCCCCGCATGTCTCTC---tgggg            | S1: -1, S2: -4  |
|          | ttccaGAC---CCAGTGCTAGCTCTTcct.....acaGCCCCGCATGTCTCTCT-CCTtgggg           | S1: -2, S2: wt  |
| KS12-182 | ttccaGAC-----CCTtgggg                                                     | S1S2: -169      |
|          | ttccaGAC-----CCTtgggg                                                     | S1S2: -169      |
| KS12-183 | ttccaGAC--TTCCAGTGCTAGCTCTTcct.....acaGCCCCGCATGTCTCTCT-CCTtgggg          | wt              |
|          | ttccaGAC-----CCTtgggg                                                     | S1S2: -169      |
| KS12-185 | ttccaG-----S1S2: -203                                                     |                 |
|          | ttccaG-----S1S2: -203                                                     |                 |
| KS12-213 | ttccaGAC--TTCCAGTGCTAGCTCTTcct.....acaGCCCCGCATGTCTCTCT-CCTtgggg          | wt              |
|          | ttccaGA-----GCTCTTcct.....acaGCCCCGCATGTCTCTCT-CCTtgggg                   | S1: -12, S2: wt |
| KS12-214 | ttccaGAC---TCCAGTGCTAGCTCTTcct.....acaGCCCCGCATGTCTCTCT <b>T</b> CCTtgggg | S1: -1, S2: +1  |
|          | ttccaGAC---CCAGTGCTAGCTCTTcct.....acaGCCCCGCATGTCTCTC---tgggg             | S1: -2, S2: -4  |
| KS12-231 | ttccaGAC <b>A</b> -TTCCAGTGCTAGCTCTTcct.....acaGCCCCGCATGTCTCTCTACCTtgggg | S1: +1, S2: +1  |
|          | ttccaGAC-----GTGCTAGCTCTTcct.....acaGCCCCGCATG-----tgggg                  | S1: -5, S2: -10 |

The mutated alleles are shown below the wild-type sequence. The distance between ERF922-S1 and ERF922-S2 is 135-bp (the black apostrophe indicates nucleotides are not shown in.). The target sites nucleotides are shown in black capital letters and black dashes. The PAM site nucleotides are underlined. The red dashes indicate the deleted nucleotides. The red capital letters indicate inserted nucleotides and the apostrophe followed to red capital letters indicates inserted nucleotides are not shown in. “-” and “+” indicate deletion and insertion of the indicated number of nucleotides, respectively “-/+” indicates simultaneous deletion and insertion of the indicated number of nucleotides. S1: ERF922-S1; S2: ERF922-S2; S1S2: deletion between ERF922-S1 and ERF922-S2; wt: wild-type sequence.
