# Supplementary material for: Enhanced Rice Blast Resistance by CRISPR/Cas9-Targeted Mutagenesis of the ERF Transcription Factor Gene OsERF922
Source: PubMed Central journal article supplement (PMC4846023; doi:10.1371/journal.pone.0154027), 2016-04-26
Supplement: pone.0154027.s008.pdf [file pone.0154027.s008.pdf]

**S3 Table. Nucleotide sequences at the target sites in C-ERF922S1S2S3-induced To mutant rice plants**

| Mutant plants | Sequence (5'-3')                                                                                                          |                                                                          |                          | Mutation type              |
|---------------|---------------------------------------------------------------------------------------------------------------------------|--------------------------------------------------------------------------|--------------------------|----------------------------|
|               | S1                                                                                                                        | S2                                                                       | S3                       |                            |
| wild-type     | ttccaGAC-TTCCAGTGCTAGCTCTTcct.....acaGCCCCGCATGTCTCTCT-CCTtgggg.....ccgGCG-TCGGTGCCGATCGCCTCgcc                           |                                                                          |                          | wt                         |
| KS123-6       | ttccaGAC-T-----                                                                                                           | -----                                                                    | -----CGGTGCCGATCGCCTCgcc | S1S3: -195                 |
| KS123-8       | ttccaGAC-T-----                                                                                                           | -----                                                                    | -----CGGTGCCGATCGCCTCgcc | S1S3: -195                 |
| KS123-13      | ttccaGACATTCAGTGCTAGCTCTTcct.....acaGCCCCGCATGTCTCTC-CCTtgggg.....ccgGCGTCGGTGCCGATCGCCTCgcc                              |                                                                          |                          | S1: +1, S2: -1, S3: +1     |
| KS123-20      | ttccaGAC-T-----                                                                                                           | -----CCTtgggg.....ccgGCG-TCGGTGCCGATCGCCTCgcc                            |                          | S1S2: -168, S3: -2         |
| KS123-25      | ttccaGAC-----                                                                                                             | .....acaGCCCCGCATGTCTCTC <b>CGCCT</b> tgggg.....ccgGCG-T-----ATCGCCTCgcc |                          | S1: -42, S2: -1/+2, S3: -8 |
| KS123-33      | ttccaGAC-----CTCTTcct.....acaGCCCCGCATGTCTCTCT-----TCGGTGCCGATCGCCTCgcc                                                   |                                                                          |                          | S1: -12, S2S3: -27         |
| KS123-35      | ttccaGAC--CCAGTGCTAGCTCTTcct.....acaGCC-----GATCGCCTCgcc                                                                  |                                                                          |                          | S1: -2, S2S3: -49          |
| KS123-37      | ttccaGAC <b>T</b> TTCAGTGCTAGCTCTTcct.....acaGCCCCGCATGTCTCTCT <b>T</b> CCTtgggg.....ccgGCG <b>A</b> TCGGTGCCGATCGCCTCgcc |                                                                          |                          | S1: +1, S2: +1, S3: +1     |
| KS123-38      | ttccaGAC <b>A</b> TTCAGTGCTAGCTCTTcct.....acaGCCCCGCATGTCTCTCT-----TCGGTGCCGATCGCCTCgcc                                   |                                                                          |                          | S1: +1, S2S3: -27          |
| KS123-43      | ttccaGAC--CCAGTGCTAGCTCTTcct.....acaGCCCCGCATGTCTCTCT-----TCGGTGCCGATCGCCTCgcc                                            |                                                                          |                          | S1: -2, S2S3: -27          |
|               | ttcca-----                                                                                                                | -----                                                                    | -----GTGCCGATCGCCTCgcc   | S1S3: -202                 |
|               | ttccaGAC--CCAGTGCTAGCTCTTcct.....acaGCCCCGCATGTCTCTCT-----TCGGTGCCGATCGCCTCgcc                                            |                                                                          |                          | S1: -2, S2S3: -27          |

Continued the table

|           |                                                                                                  |                             |
|-----------|--------------------------------------------------------------------------------------------------|-----------------------------|
| KS123-46  | ttccaGAC--TCCAGTGCTAGCTCTTcct.....acaGCCCCGCATGTCTCTCTTCCTtgggg.....ccgGCGATCGGTGCCGATCGCCTCgcc  | S1: -1, S2: +1, S3: +1      |
|           | ttccaGAC--TCCAGTGCTAGCTCTTcct.....acaGCCCCGCATGTCTCTCTTCCTtgggg.....ccgGCGATCGGTGCCGATCGCCTCgcc  | S1: -1, S2: +1, S3: +1      |
| KS123-47  | ttccaGAC--TCCAGTGCTAGCTCTTcct.....acaGCCCCGCATGTCTCTC---Ttgggg.....ccgGCG---GTGCCGATCGCCTCgcc    | S1: -1, S2: -3, S3: -3      |
|           | ttccaGACTTCCAGTGCTAGCTCTTcct.....acaGCCCCGCATGTCTCTC---CCTtgggg.....ccgGCGTTCGGTGCCGATCGCCTCgcc  | S1: +1, S2: -1, S3: +1      |
| KS123-49  | ttccaGAC-----.....acaGCCCCGCATGTCTCTCT-----TCGGTGCCGATCGCCTCgcc                                  | S1: -98, S2S3: -27          |
|           | ttccaGAC-----.....acaGCCCCGCATGTCTCTCT-----TCGGTGCCGATCGCCTCgcc                                  | S1: -98, S2S3: -27          |
| KS123-50  | ttccaGAC-----.....acaGCCCCGCATGTCTCTCT-----TCGGTGCCGATCGCCTCgcc                                  | S1: -98, S2S3: -27          |
|           | ttccaGAC-----.....acaGCCCCGCATGTCTCTCT-----TCGGTGCCGATCGCCTCgcc                                  | S1: -98, S2S3: -27          |
| KS123-60  | -----GCGGATCGCCTCgcc                                                                             | S1S3: -221                  |
|           | ttccaGAC-----GCTCTTcct.....acaGCCCCGCATGTCTCTCT-----TCGGTGCCGATCGCCTCgcc                         | S1: -11, S2S3: -27          |
| KS123-71  | ttccaGAC-T---GTGCTAGCTCTTcct.....acaGCCCCGCATGTCTCTCT-----CGGTGCCGATCGCCTCgcc                    | S1: -4, S2S3: -28           |
|           | ttccaGAC-T---GTGCTAGCTCTTcct.....acaGCCCCGCATGTCTCTCT-----CGGTGCCGATCGCCTCgcc                    | S1: -4, S2S3: -28           |
| KS123-73  | ttccaGAC-----TTcct.....acaGCCCCGCAT-----gg.....ccgGCGTTCGGTGCCGATCGCCTCgcc                       | S1: -15, S2: -14, S3: +1    |
|           | ttccaGAC-----TTcct.....acaGCCCCGCAT-----gg.....ccgGCGTTCGGTGCCGATCGCCTCgcc                       | S1: -15, S2: -14, S3: +1    |
| KS123-81  | ttccaGACTTCCAGTGCTAGCTCTTcct.....acaGCCCCGCATGTCTCTC---CCTtgggg.....Cgcc                         | S1: +1, S2: -1, S3: -30     |
|           | ttccaGACTTCCAGTGCTAGCTCTTcct.....acaGCCCCGCATGTCTCTCTTCCTtgggg.....ccgGCGTCCGGTGCCGATCGCCTCCgcc  | S1: +1, S2: +1, S3: +1      |
| KS123-91  | ttccaGA--TTCAGTGCTAGCTCTTcct.....acaGCCCCGCATGTCT---CCTtgggg.....ccgGCG---TGCCGATCGCCTCgcc       | S1: -1, S2: -4, S3: -4      |
|           | -----GTGCTAGCTCTTcct.....acaGCCCCGCATGTCTCTCT-----TCGGTGCCGATCGCCTCgcc                           | S1: -16, S2S3: -27          |
| KS123-96  | ttccaGAC-TTCC-----GTGCCGATCGCCTCgcc                                                              | S1S3: -195                  |
|           | ttccaGAC--TCCAGTGCTAGCTCTTcct.....acaGCCCCGCATGTCTCTCTTCCTtgggg.....ccgGC---TCGGTGCCGATCGCCTCgcc | S1: -1, S2: +1, S3: -1      |
| KS123-100 | ttccaTTT-----GCCCCGCATGTCTCTCTTCCTtgggg.....ccgGCGATCGGTGCCGATCGCCTCgcc                          | S1: -156/+3, S2: +1, S3: +1 |
|           | ttccaGAC--TCCAGTGCTAGCTCTTcct.....acaGCCCCGCATGTCTCTC---CTtgggg.....ccgGCGATCGGTGCCGATCGCCTCgcc  | S1: -1, S2: -2, S3: +1      |
| KS123-106 | ttccaGAC-----GTGCCGATCGCCTCgcc                                                                   | S1S3: -199                  |
|           | ttccaGAC-----GTGCCGATCGCCTCgcc                                                                   | S1S3: -199                  |
| KS123-108 | ttccaGAC--TCCAGTGCTAGCTCTTcct.....acaGCCCCGCATGTCTCTC---CCTtgggg.....ccgGCG---GTGCCGATCGCCTCgcc  | S1: -1, S2: -1, S3: -3      |
|           | -----CTAGCTCTTcct.....acaGCCCCGCATGTCTCTC---CCTtgggg.....ccgGCG---GTGCCGATCGCCTCgcc              | S1: -16, S2: -1, S3: -3     |

Continued the table

|           |                                                                                                                   |                        |
|-----------|-------------------------------------------------------------------------------------------------------------------|------------------------|
| KS123-110 | tt <u>cca</u> GAC--TCCAGTGCTAGCTCTTcct.....acaGCCCCGCATGTCTCTCTTCCTtgggg..... <u>ccg</u> GCGTTCGGTGCCGATCGCCTCgcc | S1: -1, S2: +1, S3: +1 |
|           | tt <u>cca</u> GAC--TCCAGTGCTAGCTCTTcct.....acaGCCCCGCATGTCTCTCTTCCTtgggg..... <u>ccg</u> GCGTTCGGTGCCGATCGCCTCgcc | S1: -1, S2: +1, S3: +1 |
| KS123-118 | tt <u>cca</u> GACATTCAGTGCTAGCTCTTcct.....acaGCCCCGCATGT-----CGCCTCgcc                                            | S1: +1, S2S3: -44      |
|           | tt <u>cca</u> GACATTCAGTGCTAGCTCTTcct.....acaGCCCCGCATGTCTCTCT-----TCGGTGCCGATCGCCTCgcc                           | S1: +1, S2S3: -27      |
| KS123-123 | tt <u>cca</u> GAC-TTCCAGTGCTAGCTCTTcct.....acaGCCCCGCATGTCTCTCT-CCTtgggg..... <u>ccg</u> GCG-TCGGTGCCGATCGCCTCgcc | wt                     |
|           | tt <u>cca</u> GACTTTCAGTGCTAGCTCTTcct.....acaGCCCCGCATGTCTCTCTTCCTtgggg..... <u>ccg</u> GCG----TGCCGATCGCCTCgcc   | S1: +1, S2: +1, S3: -4 |
| KS123-136 | tt <u>cca</u> GACTTTCAGTGCTAGCTCTTcct.....acaGCCCCGCATGTCTCTCT-----.....-----TCGGTGCCGATCGCCTCgcc                 | S1: +1, S2S3: -27      |
|           | tt <u>cca</u> GACTTTCAGTGCTAGCTCTTcct.....acaGCCCCGCATGTCTC-----CTtgggg..... <u>ccg</u> GCG----TGCCGATCGCCTCgcc   | S1: +1, S2: -4, S3: -4 |

The mutated alleles are shown below the wild-type sequence. The distance between ERF922-S1 and ERF922-S2 is 135-bp and distance between ERF922-S2 and ERF922-S3 is 21-bp (the black apostrophes indicate nucleotides are not shown in). The target sites nucleotides are shown in black capital letters and black dashes. The red capital letters indicate inserted nucleotides and the apostrophe followed to red capital letters indicates inserted nucleotides are not shown in. The PAM site nucleotides are underlined. The red dashes indicate the deleted nucleotides. “-” and “+” indicate deletion and insertion of the indicated number of nucleotides, respectively “-/+” indicates simultaneous deletion and insertion of the indicated number of nucleotides. S1: ERF922-S1; S2: ERF922-S2; S3: ERF922-S3; S1S2: between ERF922-S1 and ERF922-S2; S2S3: between ERF922-S2 and ERF922-S3; S1S3: between ERF922-S1 and ERF922-S3; wt: wild-type sequence.
